# Supplementary material for: Prognostic Value and Regulatory Network of Immune-Related Genes in Hepatocellular Carcinoma
Source: Research Square preprint supplement (doi:10.21203/rs.3.rs-123214/v1), 2020-12-11
Supplement: Supplementary file 2 [file 2b1bdc1aa46a49a5bdf60503.docx]

**Prognostic Value and Regulatory Network of Immune-Related Genes in Hepatocellular Carcinoma**

Xiang Zhou 1, Ke-Ying Zhang2#, Fa Yang 2#, Chao Xu 2, Jian-Hua Jiao2, Xiao-Long Zhao2, Yan Wang3, Shao-Jie Liu2, Yao Jiang2, Wei-Hong Wen4**†,** and Zhao-Ying Fu1*

**Affiliation:**

1. School of Medicine, Yan’an University, Yan’an, 716000, China;
2. Department of Urology, Xijing Hospital, Fourth Military Medical University, Xi’an 710032, China;
3. Department of Surgery, The 987 Hospital of PLA, Baoji, 721004, China;
4. Department of Life Sciences and Medicine, Northwestern University, Xi’an, 710127, China.

**#Co-first author:** Ke-Ying Zhang and Fa Yang

***Corresponding author:** Zhao-Ying Fu, E-mail: [yadxfzy@yau.edu.cn](mailto:yadxfzy@yau.edu.cn).

**†Co-corresponding author:** Wei-Hong Wen, E-mail: [wenweih@fmmu.edu.cn](mailto:wenweih@fmmu.edu.cn).

**Supplementary Materials:**

**
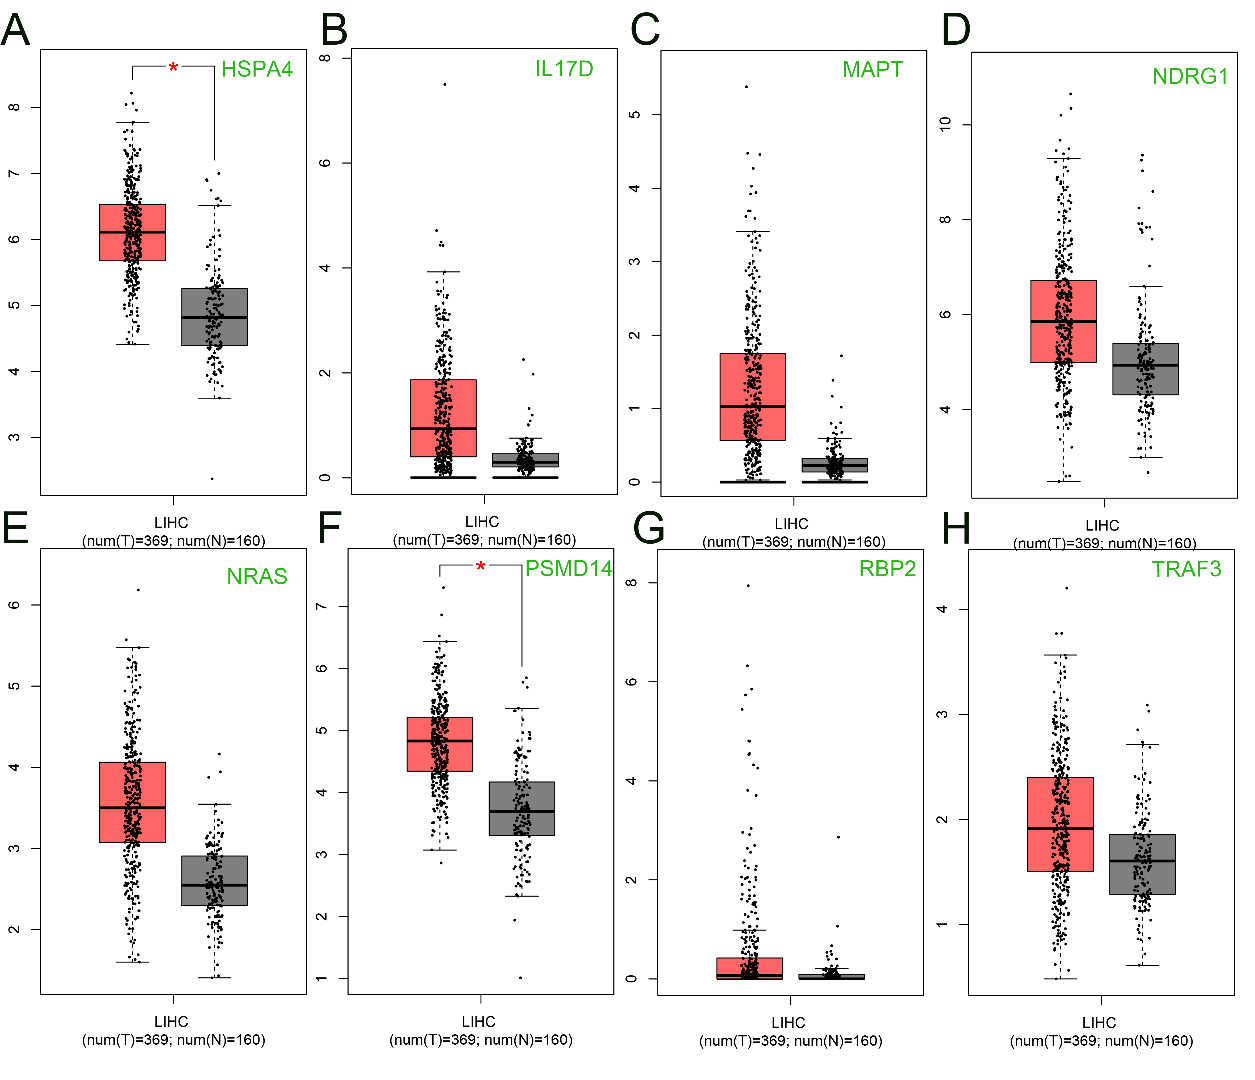
**

**Fig. S1: The expression level of PIRDEGs in tumor tissues and normal tissues.** These samples’ data of HCC were imported from TCGA and analyzed on the GIEPA website. (A) *HSPA4*. (B) *IL17D*. (C) *MAPT*. (D) *NDRG1*. (E) *NRAS*. (F) *PAMD14*. (G) *RBP2*. (H) *TRAF3*.


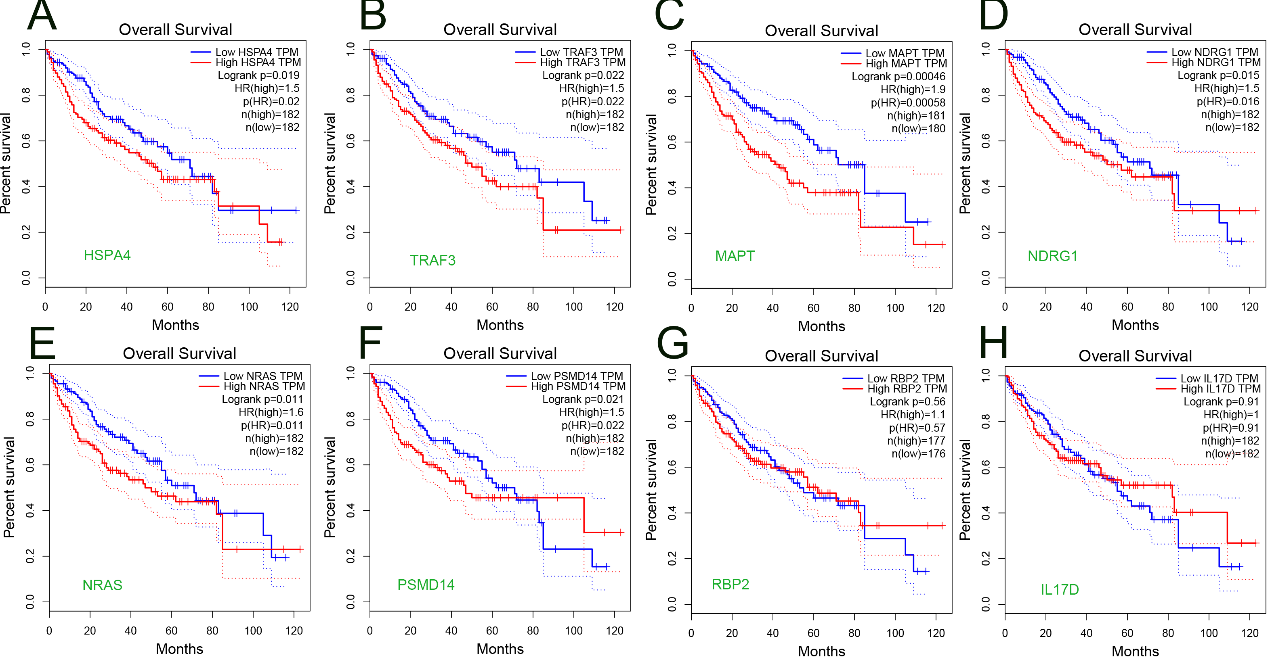


**Fig. S2: The overall survival of PIRDEGs. The overall survival of PIRDEGs was verified through a single gene input on the GIEPA website.** (A) *HSPA4*. (B) *TRAF3*. (C) *MAPT*. (D) *NDRG1*. (E) *NRAS*. (F) *PAMD14*. (G) *RBP2*. (H) *IL17D*.


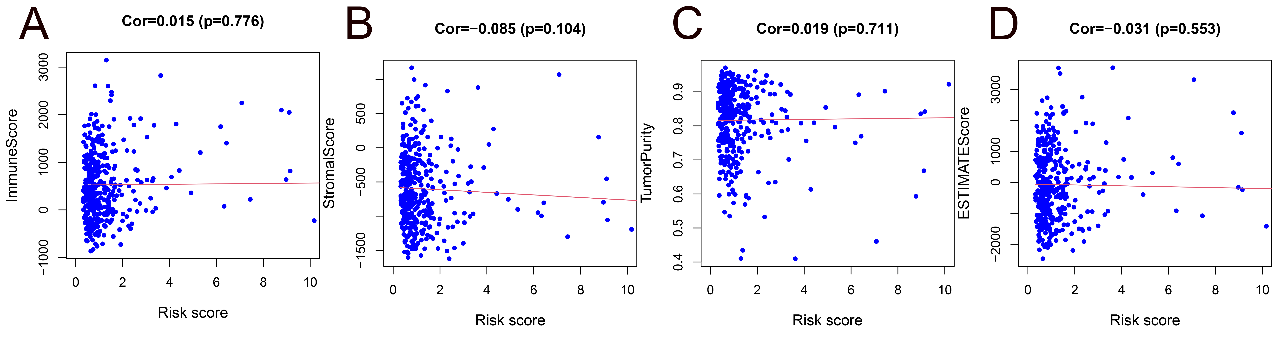


**Fig. S3: The correlation between tumor immune microenvironment and the risk score of the prognostic model.** There were a little dependency between (A) immune score, (B) stromal score, (C)tumor purity, and (D) ESTIMATE score, and the risk score.


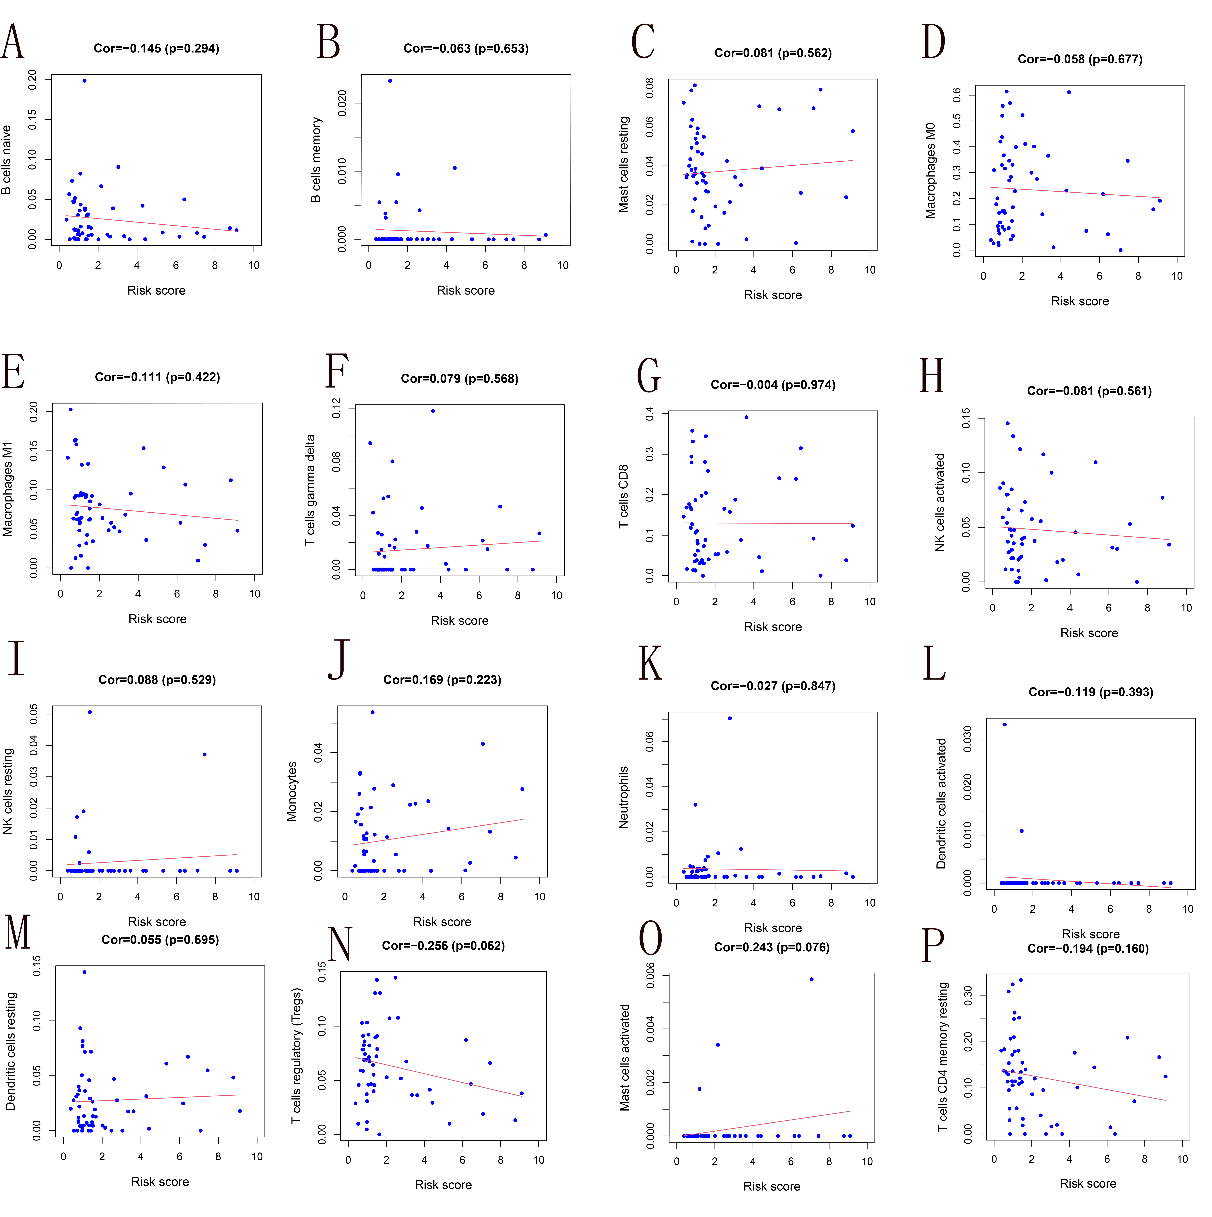


**Fig. S4: The correlation analysis between risk score and tumor-infiltrating immune cells (TIIC).** (A-P) the relationship between twenty types of immune infiltrating cells and risk score respectively. (A) naïve B cells. (B) memory B cells. (C) resting mast cells. (D) M0 macrophages. (E) M1 macrophages. (F) gamma delta T cells. (G) CD8+ T cells. (H) activated NK cells. (I) resting NK cells. (J) monocytes. (K) neutrophils. (L) activated dendritic cells. (M) resting dendritic cells. (N) regulatory T cells (Tregs). (O) activated mast cells. (P) resting CD4+ memory T cells.
